# Supplementary material for: Genome-Wide Association Study of White Blood Cell Count in 16,388 African Americans: the Continental Origins and Genetic Epidemiology Network (COGENT)
Source: PLoS Genet. 2011 Jun 30;7(6):e1002108. doi: 10.1371/journal.pgen.1002108 (PMC3128101; doi:10.1371/journal.pgen.1002108)
Supplement: Table S6 — Results of top SNPs (P<1×10−5) for basophils. (XLS) [file pgen.1002108.s011.xls]

## Sheet: S6 BASOPHILS
chr	position	snp	n	allele1	allele2	freq1	effect	stderr	pvalue	direction	hetisq	gene
11	63511087	rs11602700	6089	t	g	0.0178	0.0156	0.0029	8.47e-08	+++++	77.6	OTUB1 LOC55611 intron
14	62244713	rs4902176	6089	t	c	0.2135	0.0034	0.0007	4.65e-07	+++-+	0	KCNH5 LOC27133 coding-nonsynonymous reference mrna-utr
14	62276704	rs7143550	6089	t	c	0.3075	0.0029	0.0006	5.25e-07	+++++	0	KCNH5 LOC27133 intron
9	8150729	rs17540468	6089	t	c	0.0165	0.0121	0.0024	5.88e-07	-++--	64.2
7	33810346	rs6948754	6089	t	c	0.4645	0.0029	0.0006	6.86e-07	+++++	0
9	100426062	rs10120452	6089	a	g	0.2992	0.0029	0.0006	7.31e-07	+++--	-10.1	GABBR2 LOC9568 intron
14	62270798	rs11627747	6089	t	c	0.6359	-0.0028	0.0006	1.29e-06	---+-	0	KCNH5 LOC27133 intron
15	21587066	rs11161351	6053	t	c	0.9669	-0.0074	0.0015	1.59e-06	+--+-	66.5
3	14771148	rs17040258	6052	t	c	0.0157	0.0109	0.0023	1.84e-06	+++-+	0	C3orf20 LOC84077 intron
14	62280704	rs8017931	6089	t	c	0.6772	-0.0028	0.0006	1.89e-06	----+	0	KCNH5 LOC27133 intron
6	163897115	rs9688570	6078	t	c	0.1641	-0.0036	0.0007	1.89e-06	---+-	0	QKI LOC9444 intron
14	62253679	rs12587728	6089	t	c	0.6763	-0.0028	0.0006	1.92e-06	-----	0	KCNH5 LOC27133 intron
1	155184761	rs12138039	6089	t	c	0.0131	0.0141	0.003	2.23e-06	+++-+	0	ARHGEF11 LOC9826 coding-synonymous reference
2	227799905	rs13028299	6089	a	g	0.5158	-0.0027	0.0006	2.24e-06	---0-	0	COL4A3 LOC1285 intron
2	126211636	rs11890262	6089	t	c	0.9276	-0.0054	0.0011	2.29e-06	----+	21
6	163889921	rs16895106	6043	a	t	0.1655	-0.0035	0.0007	2.3e-06	---+-	0	QKI LOC9444 intron
6	163898316	rs16895109	6089	a	g	0.1645	-0.0035	0.0007	2.58e-06	---+-	0	QKI LOC9444 intron
6	163898962	rs16895112	6089	t	c	0.1646	-0.0035	0.0007	2.58e-06	---+-	0	QKI LOC9444 intron
3	179262637	rs10212387	6089	a	c	0.8995	-0.0046	0.001	2.83e-06	-----	-15.3
1	218883904	rs7523054	6089	a	g	0.98	-0.0092	0.002	3.1e-06	---+-	-40.8	MARK1 LOC4139 intron
2	227069429	rs10933150	6089	a	t	0.3569	0.0027	0.0006	3.5e-06	+++++	-26.7
6	163896863	rs9688970	6089	a	t	0.8341	0.0034	0.0007	3.81e-06	+++-+	0	QKI LOC9444 intron
1	218759445	rs6704108	6089	a	g	0.9784	-0.009	0.0019	3.82e-06	---+-	-3.5
1	218860046	rs17008084	6089	t	c	0.0204	0.0091	0.002	3.91e-06	+++-+	-47.8	MARK1 LOC4139 intron
14	62281103	rs8022524	6053	t	c	0.688	-0.0028	0.0006	4e-06	-----	0	KCNH5 LOC27133 intron
6	138002323	rs563511	5903	t	c	0.937	-0.0054	0.0012	4.12e-06	-+---	-3.2
1	218863101	rs6670387	6089	t	c	0.9798	-0.009	0.002	4.12e-06	---+-	-45.6	MARK1 LOC4139 intron
14	62257839	rs8022157	6089	a	g	0.3234	0.0027	0.0006	4.15e-06	+++++	0	KCNH5 LOC27133 intron
6	163615743	rs9458769	6089	a	g	0.8974	-0.0042	0.0009	4.41e-06	-----	-45.3	PACRG LOC135138 intron
6	134405904	rs9493805	6089	t	c	0.0429	0.0087	0.0019	4.49e-06	+++++	13.5	SLC2A12 LOC154091 intron
10	11214102	rs7093401	6089	t	c	0.0564	0.0056	0.0012	4.71e-06	+-+++	39.6	CUGBP2 LOC10659 intron
1	218912662	rs3897868	6089	t	c	0.0169	0.0107	0.0023	5.25e-06	+++-+	-31.1
14	62260847	rs10483754	6052	a	g	0.6762	-0.0027	0.0006	5.36e-06	-----	0	KCNH5 LOC27133 intron
10	106337084	rs7917635	6089	a	g	0.0449	0.0069	0.0015	5.77e-06	+++-+	55.2
14	62259523	rs11158449	6052	t	g	0.6561	-0.0026	0.0006	5.97e-06	-----	0	KCNH5 LOC27133 intron
8	139360445	rs10875422	6089	c	g	0.6491	-0.0026	0.0006	6.09e-06	---+-	47.6
10	120321926	rs1711880	6089	a	c	0.6977	-0.0026	0.0006	6.19e-06	---+-	8.6
1	157336737	rs2518565	6089	a	g	0.5803	-0.0026	0.0006	6.36e-06	---+-	0
1	218866229	rs3849285	6052	a	t	0.0199	0.0089	0.002	6.41e-06	+++-+	-30.6	MARK1 LOC4139 intron
10	3917451	rs7075364	6089	t	c	0.3451	0.0027	0.0006	6.73e-06	+++--	-5.4
5	100739983	rs10058511	6089	t	c	0.9735	-0.0081	0.0018	6.74e-06	---+-	0
10	5623371	rs7074607	2836	a	g	0.0237	0.0099	0.0022	8.04e-06	??+--	-30
14	87695996	rs8010969	6051	a	g	0.1733	0.0033	0.0007	8.04e-06	+++++	0
12	103101624	rs12317467	6008	a	g	0.0867	0.0044	0.001	8.12e-06	+++++	0
1	218912703	rs3897869	6089	t	c	0.9797	-0.009	0.002	8.44e-06	---+-	0
15	47925516	rs8025533	6089	t	g	0.0572	0.0055	0.0012	8.68e-06	+++-+	0
11	63976323	rs10792436	6089	a	g	0.371	0.0029	0.0007	8.83e-06	+++--	0
4	44814649	rs9999372	6089	t	c	0.3284	-0.0026	0.0006	8.91e-06	---+-	0
10	3916920	rs12771235	6089	a	g	0.3712	0.0026	0.0006	8.99e-06	++++-	-10.1
10	106427370	rs872774	6051	t	c	0.8732	-0.0037	0.0008	9.53e-06	-----	60.1	SORCS3 LOC22986 intron
14	87583770	rs7151916	6089	t	c	0.0587	0.0055	0.0012	9.65e-06	++++-	31
3	3203123	rs9828825	5962	a	g	0.1139	0.0039	0.0009	9.72e-06	++++-	-35.7
